# Supplementary material
Source: publisher figshare collection journal article supplement (https://aacr.figshare.com/articles/dataset/_/22402391)
Supplement: Supplementary file 1 [file 39848186]

**Supplementary Table S4.** p53 mutation status and proportion of CD44+ cells in gastric tumor xenografts

| Line | p53 status              | % CD44+ cells |
|------|-------------------------|---------------|
| GC16 | Wild Type               | 4%            |
| GC21 | Mutant: R175C and R273C | 58%           |
| GC38 | Mutant: N239 insertion  | 44%           |
| GC45 | Wild Type               | 95%           |

Mutations of p53 in the indicated xenograft lines were determined by Sanger sequencing of cDNA generated by reverse transcription polymerase chain reaction. R175C is a known mutation in colon and uterine cancer [1] that has been reported to retain wild-type functions [2]. R273C is a known mutation in multiple cancers [1]. N239 insertion is a novel mutation in the DNA binding domain of p53.

References:

1. De Vries, EMG et al. Database of mutations in the p53 and APC tumor suppressor genes designed to facilitate molecular epidemiological analyses. *Human Mutation* 7: 202-213 (1996)
2. Joerger and Firsh. Structure–function–rescue: the diverse nature of common p53 cancer mutants. *Oncogene* 26: 2226-2242 (2007)
